# Supplementary material for: Transcranial photosensitiser-free laser treatment of glioblastoma in rat brain
Source: Research Square preprint supplement (doi:10.21203/rs.3.rs-2666422/v1), 2023-03-24
Supplement: Supplementary file 1 [file 48e4a4af2630fb9c08e85f23.docx]

**Supplementary materials**

**Transcranial photosensitiser-free laser treatment of glioblastoma in rat brain**

O. Semyachkina-Glushkovskaya1,2*, S. Sokolovski3*, A. Noghero4, D. Bragin4,5, O. Bragina4,5, I. Fedosov2, E. A. Shirokov2,7, N. Navolokin2,8, A. Bucharskaya2,8, A. Khorovodov2, I. Blokina2, A. Terskov2, A. Dubrovski2, V. Telnova2, M. Tsoy2, Borisova2,6, J. Kurths1,2,9, E. Rafailov3

1Physics Department, Humboldt University, Newtonstrasse 15, 12489 Berlin, Germany

2Saratov State University, Astrakhanskaya Str. 83, 410012 Saratov, Russia

3Optoelectronics and Biomedical Photonics Group, AIPT, Aston University, Birmingham, UK

4Lovelace Biomedical Research Institute, Albuquerque, NM 87108, USA

5Department of Neurology, University of New Mexico School of Medicine, Albuquerque, NM 87131, USA.

6Institute of Electronics, Bulgarian Academy of Sciences Tsarigradsko Chaussee Blvd. 72, Sofia 1784, Bulgaria

7Institute of Biochemistry and Physiology of Plants and Microorganisms, Russian Academy of Sciences, Prospekt Entuziastov 13, Saratov 410049, Russian Federation

8Saratov Medical State University, Bolshaya Kazachaya Str. 112, Saratov 410012, Russian Federation

9Potsdam Institute for Climate Impact Research, Telegrafenberg A31, 14473 Potsdam, Germany

*O. S.-G.: [glushkovskaya@mail.ru](mailto:glushkovskaya@mail.ru)

*S.G.S.: [s.sokolovsky@aston.ac.uk](mailto:s.sokolovsky@aston.ac.uk)

| 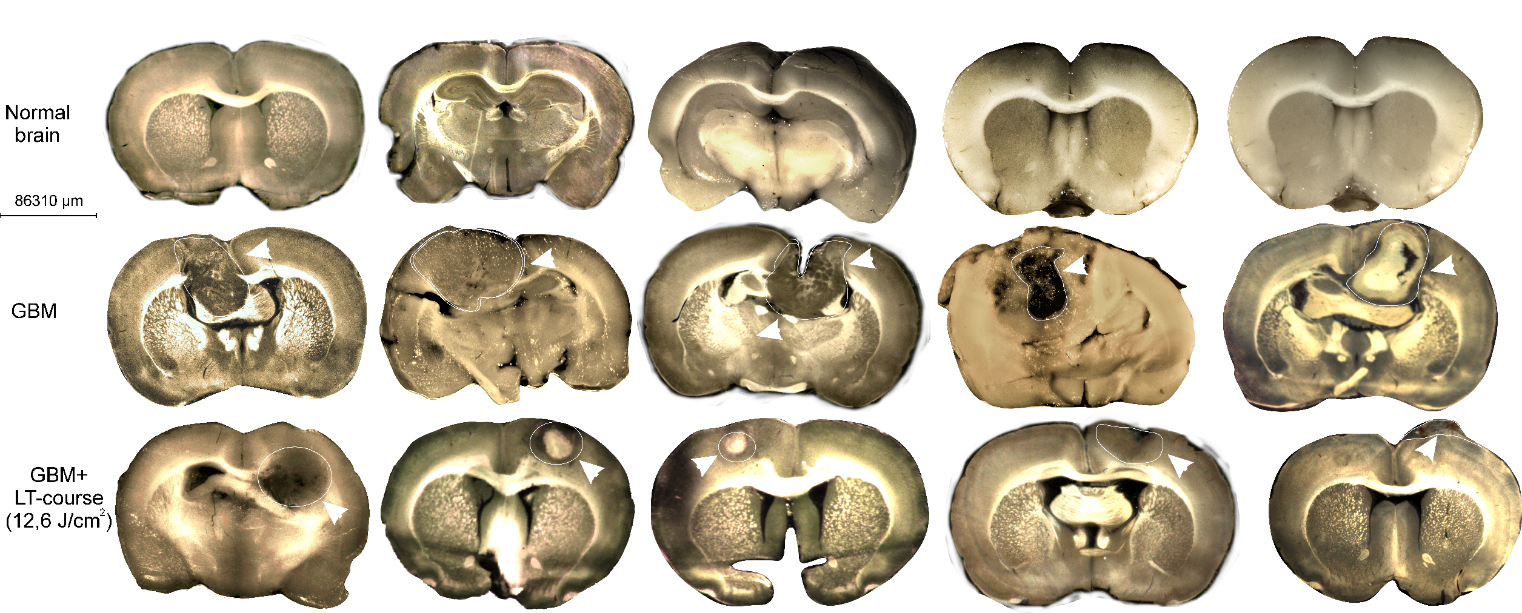 |
| --- |
| Figure 1SI. - Representative 2D images of the normal rat brain (at the top), 4 weeks of GBM growth without (middle) and after the 12.6 J/cm2 LT (on the bottom) |

| 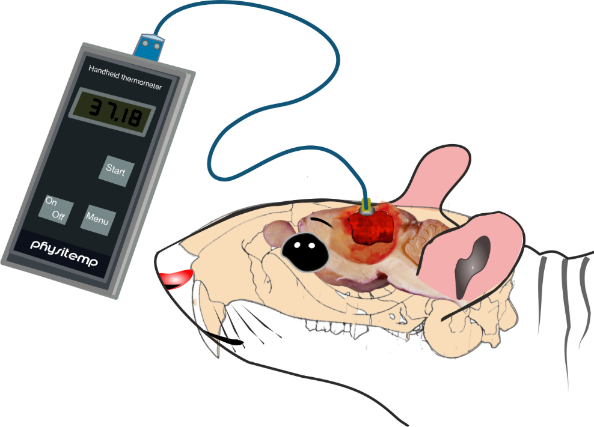  **A**  **B** | 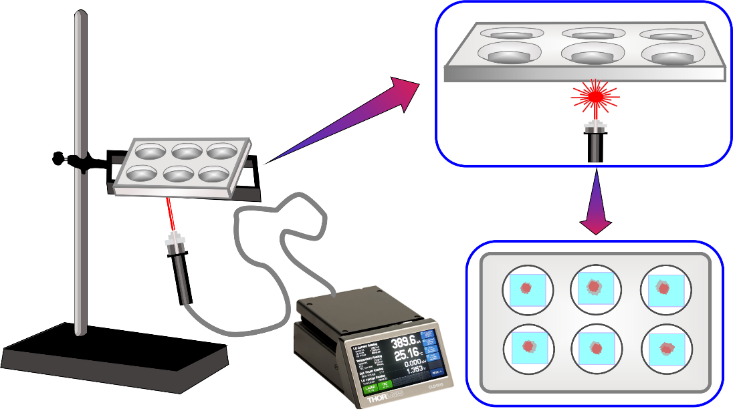 |
| --- | --- |
| **Figure 2SI**. –Schematic illustration of *in vivo* temperature measurements on the surface of the rat brain with mature GBM (**A**). Schematic illustration of NIR laser irradiation applied to the C6 glioma cell cultures in 6-wellplates (**B**).  Since mature GBM reaches the cortex surface and appears under the skull on the surrounding intact brain tissues. The optical setup was developed based on the use of 1267 nm laser (LD-1267-FBG-350, Innolume, Dortmund, Germany, laser driver: THORLABS CLD1015) with collimator (Thorlabs Ltd., USA) given 5 mm diameter beam on the illuminated surface of the rat skull. The scattering coefficient and diffuse transmittance were measured on the freshly harvested skull bone of 8 weeks old rats.  The confluent (70-80%) C6 glioma cell cultures on coverslips were irradiated with the same laser setup as described above. | |

Table 1SI.- Temperature (0C) at the external surface of skull and the brain cortex before and after LT in rats with GBM of 4 weeks growth

| Number of group | Number of rat/ Thermo-couple positioning | 1 | 2 | 3 | 4 | 5 | 6 | 7 | 8 | 9 | 10 | Mean±SEM/ | Mean±STD | Mean±SEM | Welch  test |
| --- | --- | --- | --- | --- | --- | --- | --- | --- | --- | --- | --- | --- | --- | --- | --- |
| no LT | | | | | | | | | | | | | | | | |
| 1 |  | 35.49 | 35.57 | 35.68 | 35.74 | 36.46 | 35.31 | 36.26 | 36.15 | 35.84 | 35.28 | 35.77±0.13 | 35,78±0,40 | 35,78±0,13 |  |
| 2 | Under the skull on the cortex surface | 37.25 | 37.31 | 37.18 | 37.28 | 37.29 | 37.11 | 36.27 | 37.23 | 37.32 | 37.26 | 37.15±0.31 | 37,15±0,32 | 37,15±0,10 |  |
| 70 mW | | | | | | | | | | | | | | | | |
| 3 | The skull external surface | 36.28 | 36.15 | 36.21 | 36.21 | 36.05 | 35.63 | 36.07 | 36.52 | 35.71 | 35.39 | 36.02±0.34 | 36,022±0,34 | 36,022±0,11 | Comparison with №1  NO differences  P=0,1607 |
| 4 | Under the skull on the cortex surface | 37.00 | 37.71 | 37.12 | 37.49 | 36.71 | 36.55 | 36.81 | 37.22 | 38.45 | 36.22 | 37.13±0.82 | 37,13±0,64 | 37,123±0,20 | Comparison with №2  NO differences P=0,9237 |
| 100 mW | | | | | | | | | | | | | | | | |
| 5 | The skull external surface | 36.48 | 36.44 | 36.38 | 36.52 | 36.09 | 36.55 | 36.62 | 36.67 | 39.45 | 39.00 | 37.02±1.14 | 37,02±1,18 | 37,02±0,37 | Comparison with №1  Different  P<0.01  P= ,00907 |
| 6 | Under the skull on the cortex surface | 37.34 | 37.01 | 37.24 | 37.11 | 37.03 | 36.98 | 36.84 | 36.92 | 37.39 | 37.99 | 37.18±0.32 | 37,19±0,33 | 37,19±0,11 | Сравнение с №2  NO differences P=0,8126 |
| 130 mW | | | | | | | | | | | | | | | | |
| 7 | The skull external surface | 37.69 | 37.84 | 37.19 | 37.68 | 37.48 | 38.17 | 37.88 | 38.10 | 38.53 | 38.99 | 37.95±0.52 | 37,96±0,52 | 37,96±0,16 | Comparison with №1  Different  P=8,39984E-9 |
| 8 | Under the skull on the cortex surface | 39.13 | 39.21 | 38.56 | 39.22 | 39.03 | 39.45 | 38.84 | 39.42 | 39.15 | 38.15 | 39.01±0.4 | 39,02±0,40 | 39,02±0,13 | Comparison with №2  Different  p<0.01 |

Table 2SI. – The statistical analysis of survival rate in the GBM and GBM+LT (12.6 kJ/cm2) groups and in the LV ligation group

| The name of test | X2 test | Significance |
| --- | --- | --- |
| between the GBM and GBM+LT (8.7 kJ/cm2) | | |
| Log Rank (Mantel-Cox) | 2.2E-2 | 0.88 |
| Breslow (Generalized Wilcoxon) | 6E-3 | 0.94 |
| Tarone-Ware | 1E-3 | 0.97 |
| between the GBM and GBM+LT (12.6 kJ/cm2) | | |
| Log Rank (Mantel-Cox) | 18.82 | 1.4E-5 |
| Breslow (Generalized Wilcoxon) | 35.7 | 2.3E-09 |
| Tarone-Ware | 29.09 | 6.9E-08 |
| between the GBM and GBM+LT (16.3 kJ/cm2) | | |
| Log Rank (Mantel-Cox) | 14.35 | 1.6E-4 |
| Breslow (Generalized Wilcoxon) | 8.45 | 3.6E-3 |
| Tarone-Ware | 10.93 | 9.5E-4 |
| Between the GBM group and the LV ligation group | | |
| Log Rank (Mantel-Cox) | 48.35 | 3.6E-12 |
| Breslow (Generalized Wilcoxon) | 41.03 | 1.5E-10 |
| Tarone-Ware | 44.90 | 2.1E-11 |

n=30 in each group

Table 3SI.– The effects of LT-course with different laser doses on the 2-weeks and 4-weeks old GBM volume (mm3)

| Number of rats | 1 | 2 | 3 | 4 | 5 | 6 | 7 | 8 | 9 | 10 | Mean±  SEM | Welch’s test |
| --- | --- | --- | --- | --- | --- | --- | --- | --- | --- | --- | --- | --- |
| no LT 2 weeks old GBM | 78 | 112 | 90 | 105 | 87 | 80 | 82 | 117 | 79 | 82 | 91±4,6 |  |
| no LT 4 weeks old GBM | 201 | 243 | 212 | 209 | 197 | 261 | 263 | 199 | 202 | 264 | 225±9,7 |  |
| 8.7 J/cm2 2 weeks old GBM | 69 | 81 | 132 | 100 | 93 | 89 | 96 | 98 | 88 | 95 | 94±5,1 | Т=-0,42  Р=0,68 |
| 8.7 J/cm2 4 weeks old GBM | 288 | 315 | 310 | 309 | 274 | 245 | 118 | 135 | 173 | 166 | 233±25,5 | Т=0,31  Р=0,75 |
| 12.6 J/cm2 2 weeks old GBM | 128 | 80 | 107 | 51 | 98 | 90 | 83 | 64 | 98 | 92 | 89±6,8 | Т=-0,254  Р=0,8 |
| 12.6 J/cm2 4 weeks old GBM | 203 | 200 | 196 | 112 | 172 | 158 | 154 | 115 | 101 | 112 | 152±12,7 | Т=4,65  Р<0.001 |
| 16.3 J/cm2 2 weeks old GBM | 95 | 82 | 67 | 98 | 71 | 82 | 99 | 107 | 68 | 81 | 85±4,46 | Т=0.96  Р=0.34 |
| 16.3 J/cm2 4 weeks old GBM | 108 | 185 | 207 | 111 | 183 | 197 | 184 | 222 | 112 | 81 | 159±15,9 | Т=3.6  Р=0.002 |

The comparison between: no LT 2 weeks old GBM and 8.7; 12.6; 16.3 J/cm2/ 2 weeks old GBM; no LT for 4 weeks old GBM and 8.7; 12.6; 16.3 J/cm2/ 4 weeks old GBM

Table 4SI.– The effects of 12.6 J/cm2 LT on the 1-week and 4-weeks old GBM volume (mm3)

| Number of rats | 1 | 2 | 3 | 4 | 5 | Mean±SEM/  Test | Welch’s test |
| --- | --- | --- | --- | --- | --- | --- | --- |
| no LT 1 weeks old GBM | 6 | 12 | 27 | 6 | 1 | 10±4 |  |
| no LT 4 weeks old GBM | 149 | 349 | 174 | 232 | 225 | 225±77 |  |
| 12.6 J/cm21 week old GBM | 47 | 6 | 3 | 1 | 6 | 12±8 | Т=-0,226  Р=0,827 |
| 12.6 J/cm2 4 weeks old GBM | 102 | 108 | 50 | 76 | 163 | 99±48 | Т=3,2  Р=0,013 |

The comparison between: no LT 1 week old GBM and 12.6 J/cm2/ 1 week old GBM; no LT 4 week old GBM and 12.6 J/cm2/ 4 week old GBM

Table 5SI. – The changes of the expression of markers of apoptosis, autophagy, proliferation and vacuoles formation in sham rats and in rats with GBM without and after LT-course (12.6 kJ/cm2 laser irradiation)

| The tested markers | Sham group,  no course | Sham group + LT course | GBM group, no LT-course | GBM group + LT course | Welch’s test.  Comparison between GBM no LT course and GBM + LT course, mean±SEM, n=20 in each group |
| --- | --- | --- | --- | --- | --- |
| Cell number in the view field (x774) | 29.0±1.9 | 28.1±1.9 | 67.0±3.2 | 112.2±7.7 |  |
| Nucleus diameter, µm | 8.5±0.4 | 8.7±0.4 | 9.2±0.3 | 7.6±4.7 |  |
| Ki67 | 0.0±0.0 | 0.0±0.0 | 37.5±1.97 | 32.2±2.4 | T=22,3, p<0.01 |
| Bax | 0.0±0.0 | 0.0±0.0 | 7.1±1.1 | 95.8±2.1 | T=174,3, |
| p53 | 0.0±0.0 | 0.0±0.0 | 0.0±0.0 | 31.5±4.9 | T=43,1, p<0.01 |
| Lc3b | 100.0±0.0 | 100.0±0.0 | 95.1±1.8 | 26.4±5.14 | T=74,8, p<0.01 |
| Fas | 0.0±0.0 | 0.0±0.0 | 0.0±0.0 | 1.92±1.32 | T=7,7, p<0.01 |
| Clathrin | 0.0±0.0 | 0.0±0.0 | 94.2±2.0 | 23.6±6.4 | T=117,8, p<0.01 |
| Caveolin | 0.0±0.0 | 0.0±0.0 | 18.4±1.8 | 7.0±2.4 | T=17,6, p<0.01 |


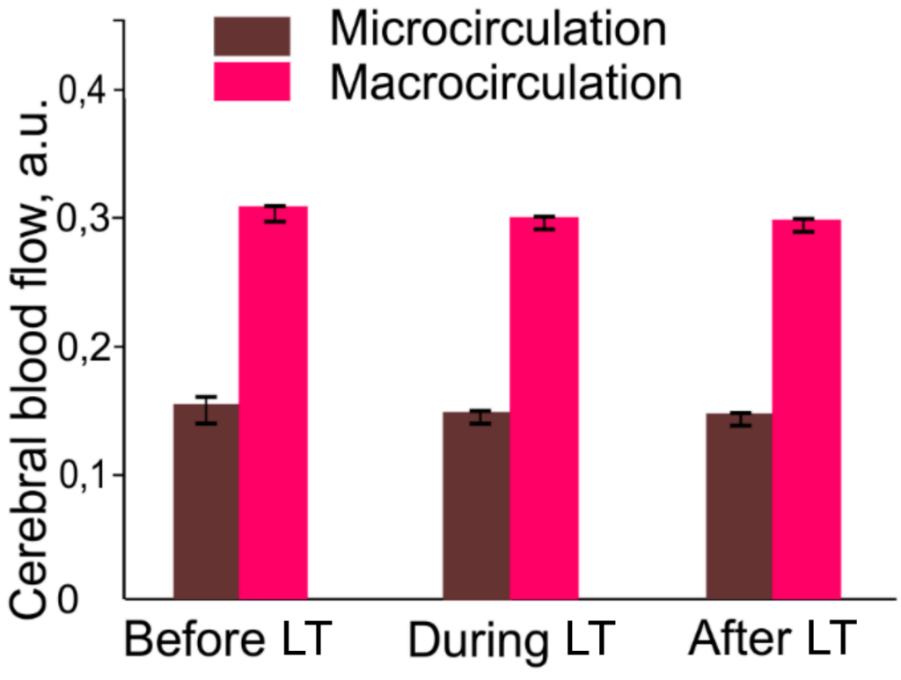


Figure 3SI. - The changes in the cerebral blood flow before and after 12.6 kJ/cm2 LT course (mean±SEM), n=10 in each group.

| 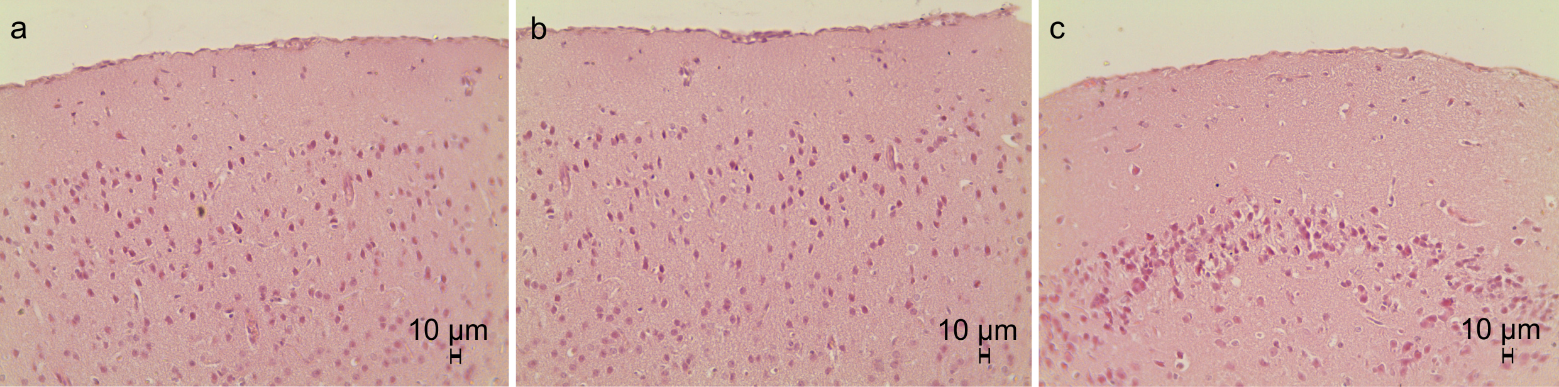 |
| --- |
| Figure 4SI. - The histological analysis of the brain tissues before (a), during (b) and after 12.6 kJ/cm2LT course, n=10 in each group |


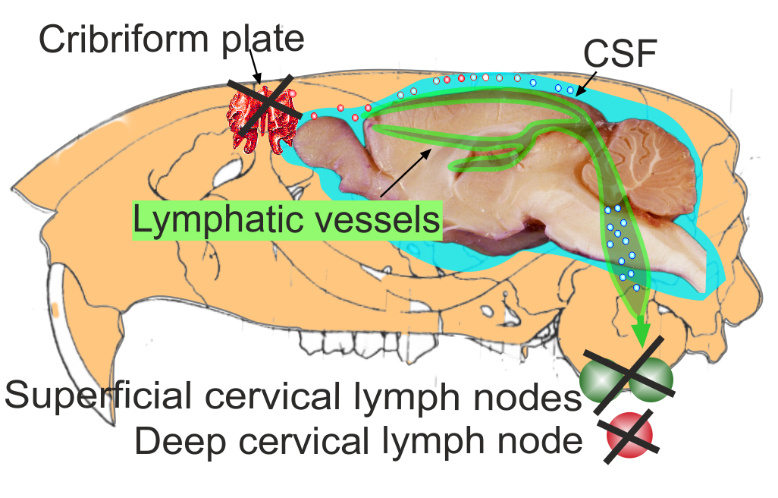


Figure 5SI. - Scheme of blocking of the cerebrospinal fluid (CSF) outflow through the cribriform plate and the cervical lymphatic vessels that is accompanied by the accumulation of extensive CSF in the brain


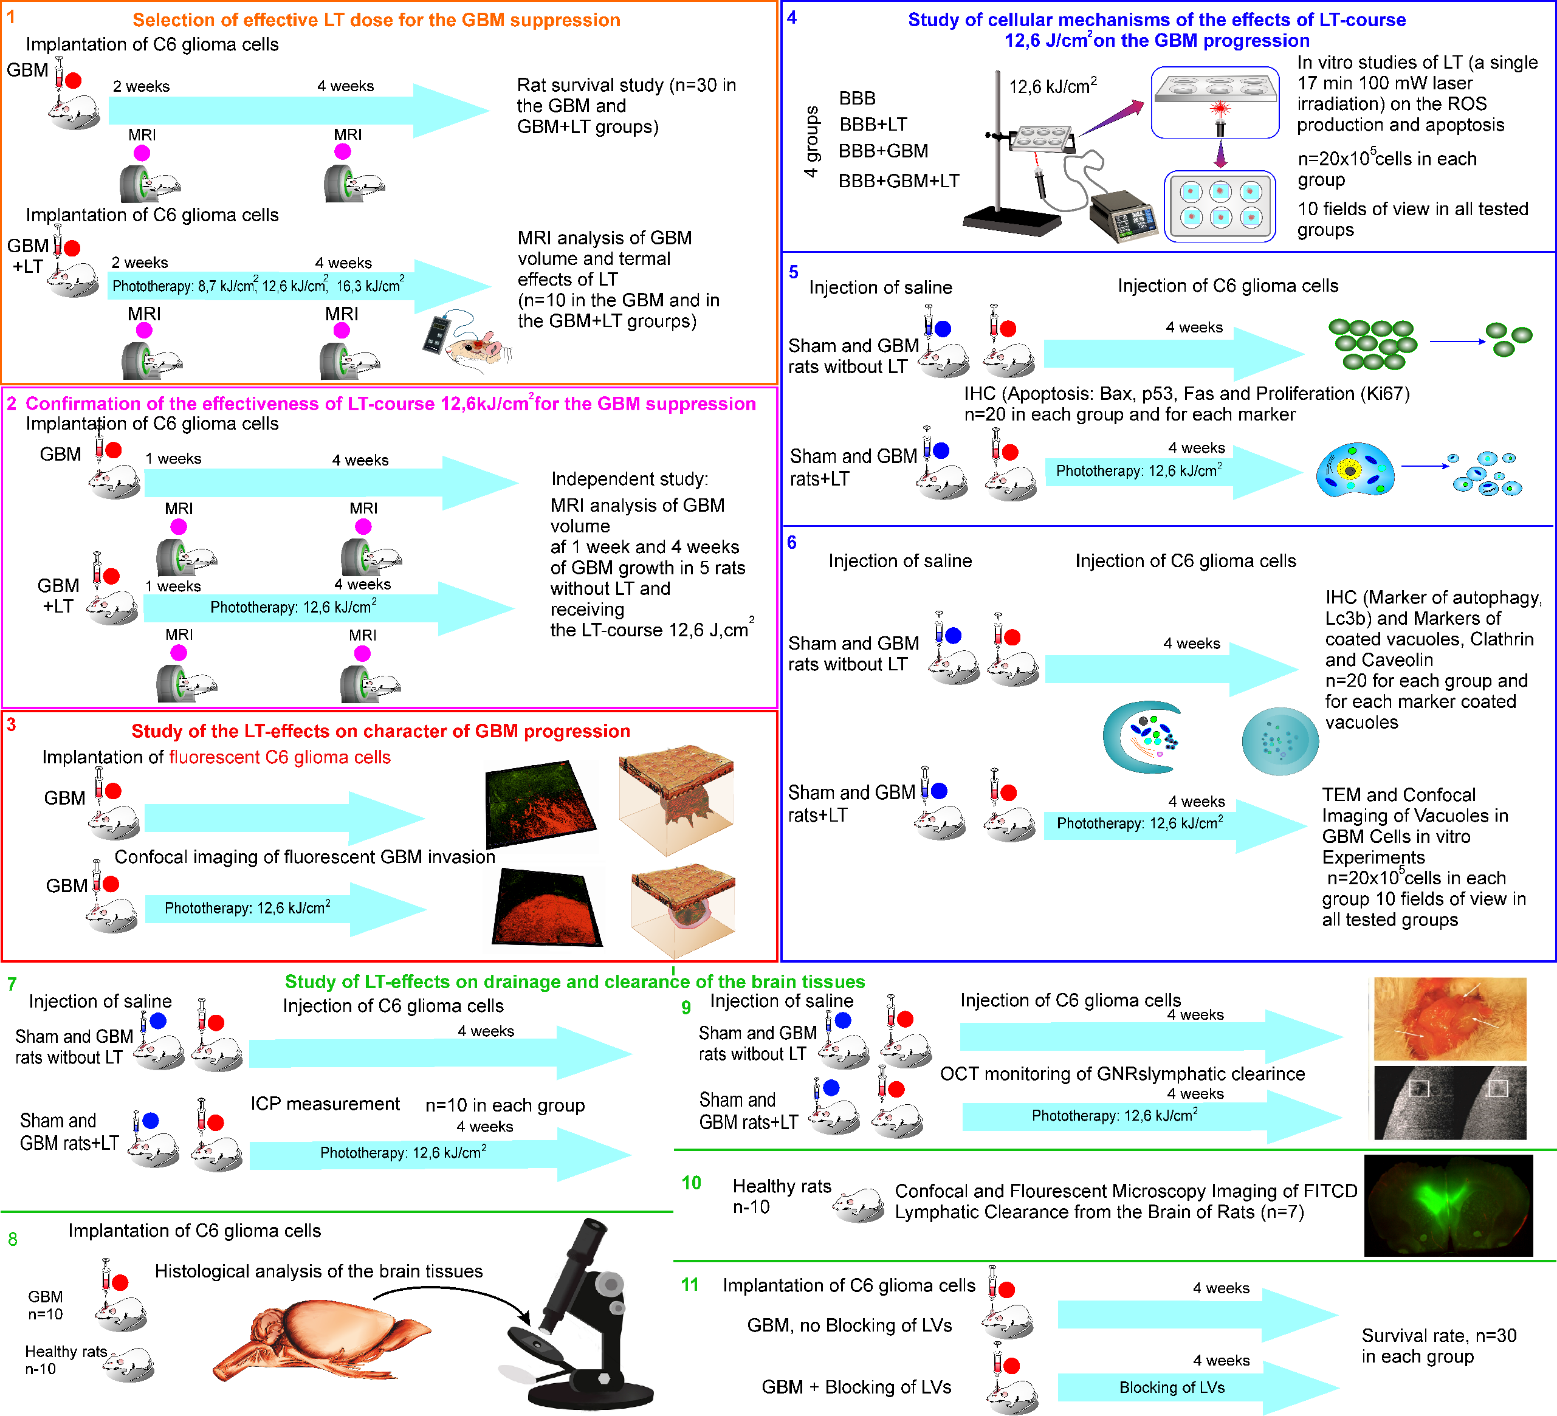


Figure 6SI. – Design of experiments to study of LT effects on GMB growth and mechanisms of LT-induced suppression of GBM progression


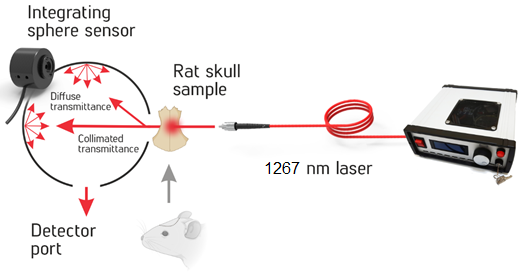


Figure 7SI. - Virtual scheme of the optic set up for measuring rat skull transmittance level for 1267 nm QD semiconductor laser.
